# Supplementary material
Source: ML conference proceedings conference paper supplement (https://openaccess.thecvf.com/content/ICCV2025/html/Shi_VSSD_Vision_Mamba_ICCV_2025_paper.html)
Supplement: Supplementary file 1 [file Shi_VSSD_Vision_Mamba_ICCV_2025_supplemental.pdf]

# Appendix for VSSD: Vision Mamba with Non-Causal State Space Duality

## Supplementary Material

| Image/Batch Size   | ConvNeXt-T | Swin-T | VMamba-T | VSSD-T      |
|--------------------|------------|--------|----------|-------------|
| <b>224/128</b>     |            |        |          |             |
| <b>GFLOPs</b>      | 4.5        | 4.5    | 4.9      | 5.0         |
| <b>Params. (M)</b> | 29         | 28     | 30       | 28          |
| <b>Memory (MB)</b> | 1670       | 2402   | 3204     | 1946        |
| <b>Acc. (%)</b>    | 82.1       | 81.3   | 82.6     | <b>83.8</b> |
| <b>384/128</b>     |            |        |          |             |
| <b>GFLOPs</b>      | 13.1       | 14.0   | 14.4     | 15.4        |
| <b>Memory (MB)</b> | 4654       | 8118   | 9169     | 5537        |
| <b>Acc. (%)</b>    | 81.0       | 80.7   | 82.4     | <b>83.5</b> |
| <b>512/128</b>     |            |        |          |             |
| <b>GFLOPs</b>      | 23.3       | 26.6   | 25.4     | 27.4        |
| <b>Memory (MB)</b> | 8181       | 19731  | 16204    | 9751        |
| <b>Acc. (%)</b>    | 78.0       | 79.0   | 80.9     | <b>81.9</b> |
| <b>640/64</b>      |            |        |          |             |
| <b>GFLOPs</b>      | 36.5       | 45.0   | 39.6     | 42.8        |
| <b>Memory (MB)</b> | 6417       | 20893  | 12710    | 7645        |
| <b>Acc. (%)</b>    | 74.3       | 76.6   | 78.6     | <b>79.4</b> |
| <b>768/64</b>      |            |        |          |             |
| <b>GFLOPs</b>      | 52.5       | 70.7   | 57.1     | 61.7        |
| <b>Memory (MB)</b> | 9189       | OOM    | 18262    | 10954       |
| <b>Acc. (%)</b>    | 69.5       | 73.1   | 74.7     | <b>75.9</b> |
| <b>1024/32</b>     |            |        |          |             |
| <b>GFLOPs</b>      | 93.3       | 152.5  | 101.5    | 109.6       |
| <b>Memory (MB)</b> | 8182       | OOM    | 16276    | 9750        |
| <b>Acc. (%)</b>    | 55.4       | 61.9   | 62.3     | <b>65.0</b> |

Table 1. Performance comparison of VSSD-T against widely used vision models on ImageNet-1K across different image resolutions on an RTX 4090 GPU. OOM indicates out-of-memory errors.

## 1. Analyzing Generalization Ability Across Increasing Input Resolutions.

Following VMamba [3], we also present detailed comparison on ImageNet-1K with increasing image resolutions with CNN-based ConvNext [5], attention-based Swin [4] and SSM-based VMamba [3]. The detailed results are presented in Table 1. At the standard 224×224 resolution, VSSD-T achieves 83.8% top-1 accuracy, outperforming ConvNeXt-T (82.1%), Swin-T (81.3%), and VMamba-T (82.6%) while maintaining a competitive parameter count of 28M and GFLOPs count of 5.0. The performance advantage of VSSD-T becomes more pronounced at higher resolutions. At 384×384, our model achieves 83.5% accuracy, surpassing VMamba-T by 1.1 percentage points. This trend continues through 512×512 (81.9%), 640×640 (79.4%), and 768×768 (75.9%) resolutions, where VSSD-

T consistently outperforms all competitors. Notably, at the 1024×1024 resolution, VSSD-T achieves 65.0% accuracy, significantly outperforming ConvNeXt-T (55.4%), Swin-T (61.9%), and VMamba-T (62.3%). Our VSSD also demonstrates significantly better memory efficiency than both Swin-T and VMamba-T. For instance, at 512×512 resolution and batch size of 128, VSSD-T consumes only 9751MB of memory compared to VMamba-T’s 16204MB and Swin-T’s 19731MB. At higher resolutions (768×768 and 1024×1024), Swin-T encounters out-of-memory errors, while VSSD-T continues to operate efficiently. These results highlight VSSD-T’s exceptional balance between accuracy, computational efficiency, and memory usage, making it particularly well-suited for high-resolution image analysis tasks.

## 2. Additional Comparison.

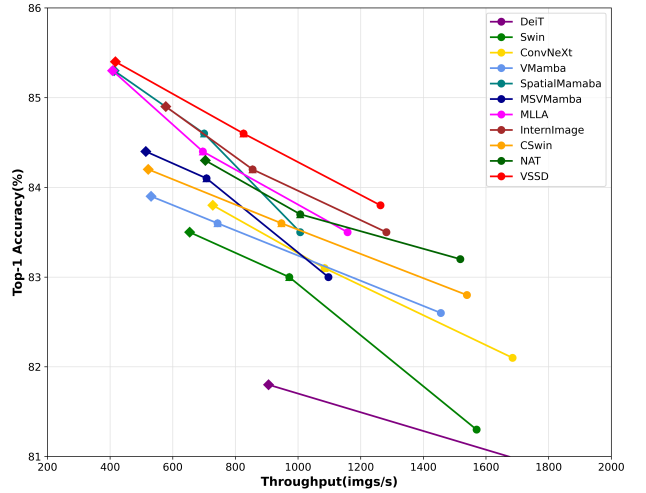

Figure 1. Efficiency comparison with more SOTA works with the same setting as the main paper.

To establish a more comprehensive analysis for our VSSD model, we present detailed comparisons with more advanced architectures specially designed for vision perception tasks, including ConvFormer [10], SG-Former [7], SMT [2], MaxViT [8], BiFormer [11], CAFormer [10], EfficientVMamba [6] and Groot-VL [9]. As shown in Table 2, we categorize the comparison across three model scales: tiny, small, and base according to parameter and FLOPs counts. Our VSSD consistently demonstrates superior performance across all scales when evaluated on the ImageNet-1K dataset. In the tiny model category,

VSSD achieves 83.8% top-1 accuracy, matching BiFormer while outperforming other attention-based models like SG-Former (83.2%) and SSM-based models like GrootVL (83.4%). The performance advantage of VSSD extends to the base model category, where it reaches 85.4% accuracy, surpassing CAFormer (85.2%) and GrootVL (84.8%). This comprehensive comparison validates the effectiveness of our proposed VSSD as a powerful alternative to existing paradigms in vision model architecture. Additionally, we also provide efficiency comparison with more SOTA works listed in the main paper in Fig .1.

| Method              | Type      | #Param. | FLOPs | Top-1 Acc(%) |
|---------------------|-----------|---------|-------|--------------|
| <b>Tiny Models</b>  |           |         |       |              |
| ConvFormer [10]     | Conv      | 27M     | 3.9G  | 83.0         |
| SG-Former [7]       | Attn      | 23M     | 4.8G  | 83.2         |
| MaxViT [8]          | Attn      | 31M     | 5.6G  | 83.6         |
| BiFormer [11]       | Attn      | 26M     | 4.5G  | 83.8         |
| SMT-T [2]           | Conv+Attn | 20M     | 4.8G  | 83.7         |
| CAFormer [10]       | Attn      | 26M     | 4.1G  | 83.6         |
| EffVMamba [6]       | Conv+SSM  | 33M     | 4.0G  | 81.8         |
| GrootVL [9]         | SSM       | 30M     | 4.8G  | 83.4         |
| VSSD                | SSD       | 28M     | 5.0G  | <b>83.8</b>  |
| <b>Small Models</b> |           |         |       |              |
| ConvFormer [10]     | Conv      | 40M     | 7.6G  | 84.1         |
| SG-Former [7]       | Attn      | 39M     | 7.5G  | 84.1         |
| MaxViT [8]          | Attn      | 69M     | 11.7G | 84.5         |
| CAFormer [10]       | Attn      | 39M     | 8.0G  | 84.5         |
| BiFormer [11]       | Attn      | 57M     | 9.8G  | 84.3         |
| SMT-T [2]           | Conv+Attn | 32M     | 7.7G  | 84.3         |
| GrootVL [9]         | SSM       | 51M     | 8.5G  | 84.2         |
| VSSD                | SSD       | 50M     | 8.1G  | <b>84.6</b>  |
| <b>Base Models</b>  |           |         |       |              |
| ConvFormer [10]     | Conv      | 57M     | 12.8G | 84.5         |
| SG-Former [7]       | Attn      | 78M     | 15.6G | 84.7         |
| CAFormer [10]       | Attn      | 56M     | 13.2G | 85.2         |
| MaxViT [8]          | Attn      | 120M    | 23.4G | 85.0         |
| GrootVL [9]         | SSM       | 91M     | 15.1G | 84.8         |
| VSSD                | SSD       | 89M     | 16.1G | <b>85.4</b>  |

Table 2. **Additional Comparison across More Advanced Models on ImageNet-1K.**

### 3. More Detailed information of VSSD

**More Details of the Proposed VSSD Model.** The VSSD model initiates with a series of overlapping convolutions serving as the stem, followed by four progressive stages of processing. First three stages are equipped with VSSD Block, comprising a NC-SSD block and a FFN. We provide illustration in Fig. 2 for clarity. Besides, the detailed setting of VSSD variants are shown in the Tab. 3.

**More Detailed Configuration of ImageNet-1K Training.** Our experiments are conducted using the ImageNet-

1K dataset [1]. Each model undergoes training for 300 epochs, which includes a 20-epoch warm-up phase. We employ the AdamW optimizer, setting the betas to (0.9, 0.999) and the momentum to 0.9. A cosine decay scheduler manages the learning rate, complemented by a weight decay rate of 0.05. The batch sizes and peak learning rates are set to 1024/1e-3 for the Tiny and Small models, and 2048/1.2e-3 for Base model, respectively. To enhance model accuracy and generalization, we incorporate exponential moving average (EMA) techniques and apply label smoothing with a coefficient of 0.1. The stochastic depth drop rates for our Tiny, Small, and Base models are set at 0.2, 0.4, and 0.6, respectively. Further details are provided in Tab. 4.

### 4. Limitations

This paper lacks experiments involving larger models and more extensive datasets, such as those using the ImageNet-22K benchmark [1]. Consequently, the scalability of the proposed VSSD model remains an area ripe for further exploration.

### References

- [1] Jia Deng, Wei Dong, Richard Socher, Li-Jia Li, Kai Li, and Li Fei-Fei. Imagenet: A large-scale hierarchical image database. In *CVPR*, 2009. 2
- [2] Weifeng Lin, Ziheng Wu, Jiayu Chen, Jun Huang, and Lianwen Jin. Scale-aware modulation meet transformer. In *ICCV*, 2023. 1, 2
- [3] Yue Liu, Yunjie Tian, Yuzhong Zhao, Hongtian Yu, Lingxi Xie, Yaowei Wang, Qixiang Ye, and Yunfan Liu. Vmamba: Visual state space model. In *NeurIPS*, 2024. 1
- [4] Ze Liu, Yutong Lin, Yue Cao, Han Hu, Yixuan Wei, Zheng Zhang, Stephen Lin, and Baining Guo. Swin transformer: Hierarchical vision transformer using shifted windows. In *ICCV*, 2021. 1
- [5] Zhuang Liu, Hanzi Mao, Chao-Yuan Wu, Christoph Feichtenhofer, Trevor Darrell, and Saining Xie. A convnet for the 2020s. In *CVPR*, 2022. 1
- [6] Xiaohuan Pei, Tao Huang, and Chang Xu. Efficientvmamba: Atrous selective scan for light weight visual mamba. *arXiv preprint arXiv:2403.09977*, 2024. 1, 2
- [7] Sucheng Ren, Xingyi Yang, Songhua Liu, and Xinchao Wang. Sg-former: Self-guided transformer with evolving token reallocation. In *ICCV*, 2023. 1, 2
- [8] Zhengzhong Tu, Hossein Talebi, Han Zhang, Feng Yang, Peyman Milanfar, Alan Bovik, and Yinxiao Li. Maxvit: Multi-axis vision transformer. In *ECCV*, 2022. 1, 2
- [9] Yicheng Xiao, Lin Song, Shaoli Huang, Jiangshan Wang, Siyu Song, Yixiao Ge, Xiu Li, and Ying Shan. Grootvl: Tree topology is all you need in state space model. In *NeurIPS*, 2024. 1, 2
- [10] Weihao Yu, Chenyang Si, Pan Zhou, Mi Luo, Yichen Zhou, Jiashi Feng, Shuicheng Yan, and Xinchao Wang. Metaformer baselines for vision. *IEEE Transactions on Pattern Analysis and Machine Intelligence*, 2024. 1, 2

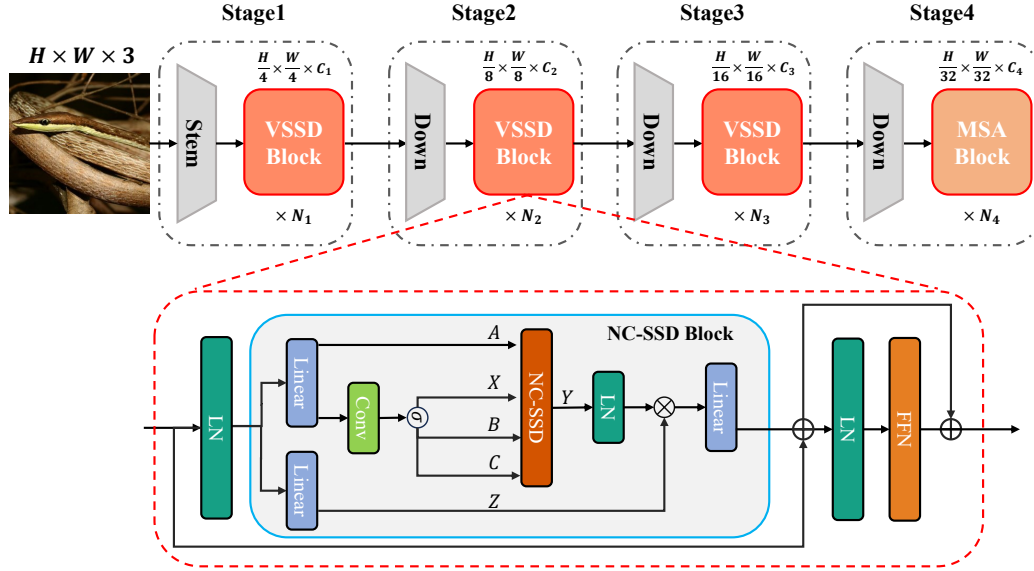

Figure 2. **Overall Architecture of the Proposed VSSD Model.** Local Perception Units (LPU) are omitted in this visualization for brevity.

| Model      | Blocks        | Channels            | Heads          | SSD Ratio | #Param | FLOPs |
|------------|---------------|---------------------|----------------|-----------|--------|-------|
| VSSD-Tiny  | [2, 2, 8, 2]  | [96, 192, 384, 768] | [4, 4, 8, 16]  | 1         | 28M    | 5.0G  |
| VSSD-Small | [2, 4, 15, 4] | [96, 192, 384, 768] | [4, 4, 8, 16]  | 1         | 51M    | 8.1G  |
| VSSD-Base  | [3, 4, 18, 5] | [96, 192, 384, 768] | [3, 6, 12, 24] | 2         | 89M    | 16.1G |

Table 3. **Model Specifications of VSSD variants.**

- [11] Lei Zhu, Xinjiang Wang, Zhanghan Ke, Wayne Zhang, and Rynson Lau. Biformer: Vision transformer with bi-level routing attention. In *CVPR*, 2023. 1, 2

| Settings                  | Tiny                 | Small            | Base   |
|---------------------------|----------------------|------------------|--------|
| Input resolution          |                      | 224 <sup>2</sup> |        |
| Epochs                    |                      | 300              |        |
| Batch size                | 1024                 | 1024             | 2048   |
| Optimizer                 |                      | AdamW            |        |
| Adam $\epsilon$           |                      | 1e-8             |        |
| Adam $(\beta_1, \beta_2)$ |                      | (0.9, 0.999)     |        |
| Learning rate             | 1e-3                 | 1e-3             | 1.2e-3 |
| Learning rate decay       |                      | Cosine           |        |
| Warmup epochs             |                      | 20               |        |
| Weight decay              |                      | 0.05             |        |
| Rand Augment              | rand-m9-mstd0.5-inc1 |                  |        |
| Cutmix                    |                      | 1.0              |        |
| Mixup                     |                      | 0.8              |        |
| Cutmix-Mixup switch prob  |                      | 0.5              |        |
| Random erasing prob       |                      | 0.25             |        |
| Label smoothing           |                      | 0.1              |        |
| Stochastic depth rate     | 0.2                  | 0.4              | 0.6    |
| Random erasing prob       |                      | 0.25             |        |
| EMA decay rate            |                      | 0.9999           |        |

Table 4. **Detailed Configuration Parameters for ImageNet-1K Training.**
